# Supplementary material for: Copper ions mediated formation of three-dimensional self-assembled Ag nanostructures via a facile solution route
Source: Royal Society of Chemistry journal article supplement (doi:10.1039/c3ce40771c), 2013-01-01
Supplement: c3ce40771c.pdf [file c3ce40771c.pdf]

## Supporting Information

### Copper ions mediated formation of three-dimensional self-assembly of Ag nanostructure via a facile solution route

Shuling Xu<sup>a</sup>, Lei Wang<sup>a</sup>, Haibo Li<sup>a</sup>, Qiaoli Yue<sup>a</sup>, Rui Li<sup>a</sup>, Jifeng Liu<sup>a\*</sup>, Xiaohong Gu<sup>b</sup> and Shuqiu Zhang<sup>b\*</sup>

*a* Department of Chemistry, Liaocheng University, Liaocheng 252059, PR China

*b* Shandong Provincial Key Lab of Test Technology on Food Quality and Safety, Shandong Academy of Agricultural Sciences, Jinan, 250100, PR China

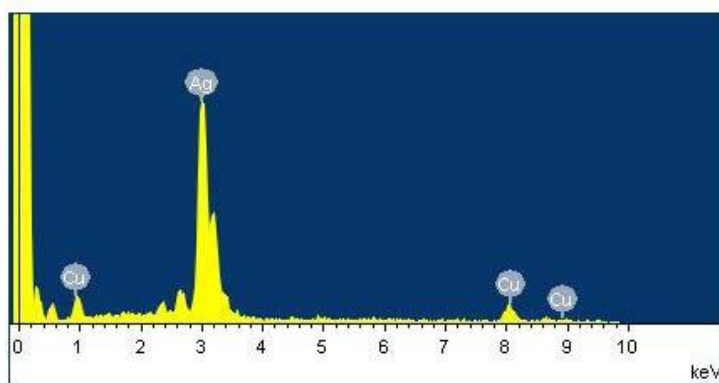

**Figure S1.** EDS patterns of the Ag nanoflowers
